# Supplementary material
Source: MDPI journal article supplement (https://www.mdpi.com/2073-4344/14/5/312)
Supplement: s1 [file s1]

## **Supplementary Information**

**Table S1:** Surface area results of used catalysts

| <b>Catalyst</b> | <b>BET<br/>surface area<br/>(m<sup>2</sup>/g)</b> |
|-----------------|---------------------------------------------------|
| UsedPtSn-N2     | 111.0                                             |
| UsedPtSn-SA     | 153.9                                             |
| UsedPtSn-FA     | 136.1                                             |
| UsedPtSnZnCa-N2 | 180.6                                             |
| UsedPtSnZnCa-SA | 141.3                                             |
| UsedPtSnZnCa-FA | 173.8                                             |

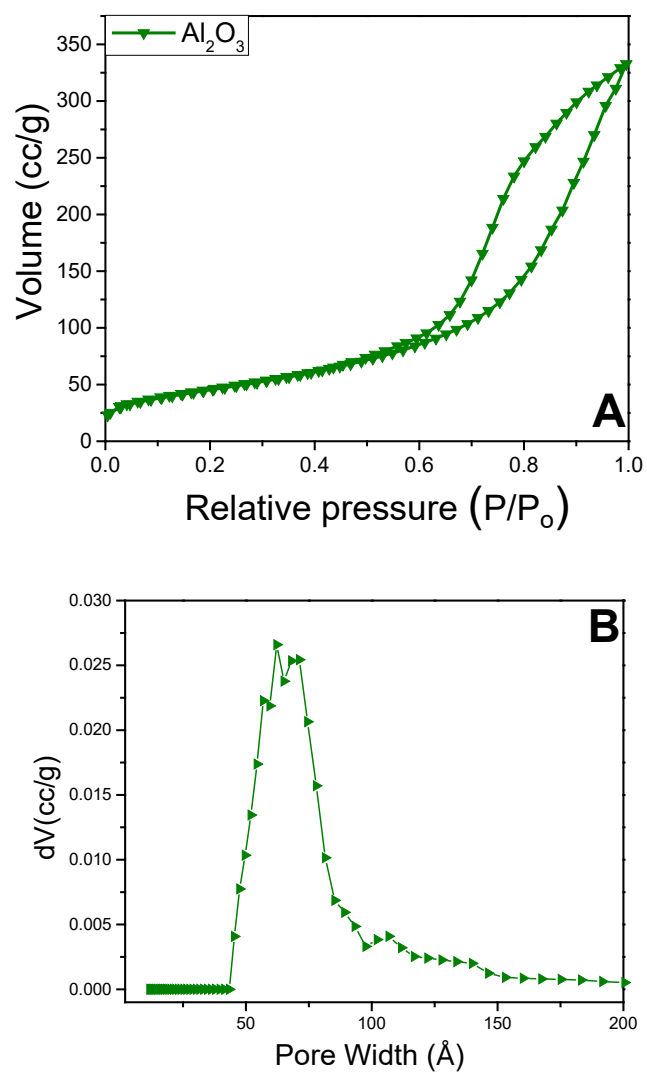

**Figure S1.** (A) Nitrogen adsorption-desorption isotherms, (B) Pore-size distribution of calcined  $\text{Al}_2\text{O}_3$  support

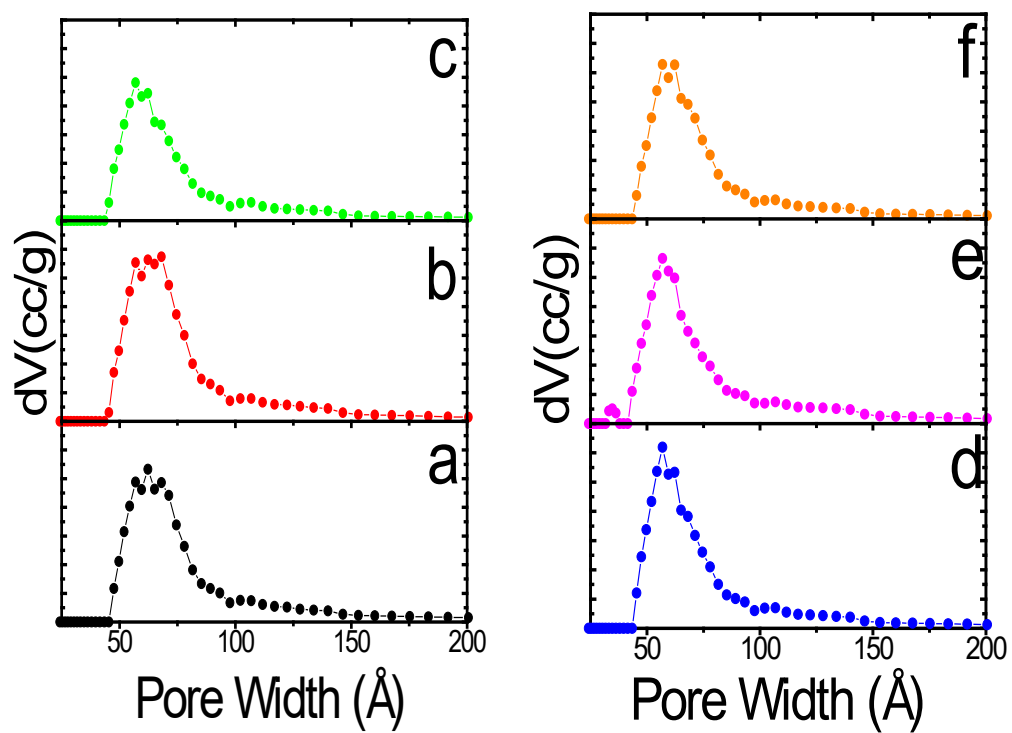

**Figure S2.** Pore size distribution curves of the calcined catalysts: a. PtSn-FA, b. PtSn-N<sub>2</sub>, c. PtSn-SA, d. PtSnZnCa-FA, e. PtSnZnCa-N<sub>2</sub>, f. PtSnZnCa-SA.

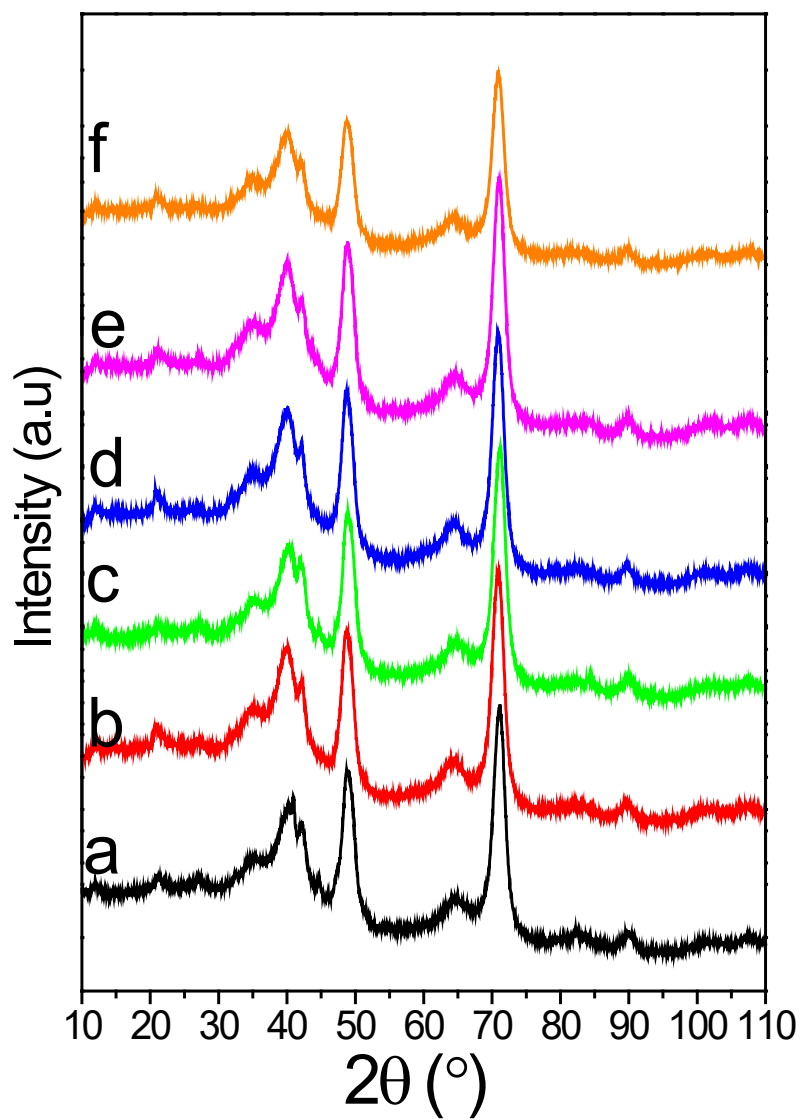

**Figure S3.** X-ray diffraction patterns of used catalysts: a. PtSn-FA, b. PtSn-N<sub>2</sub>, c. PtSn-SA, d. PtSnZnCa-FA, e. PtSnZnCa-N<sub>2</sub>, f. PtSnZnCa-SA.

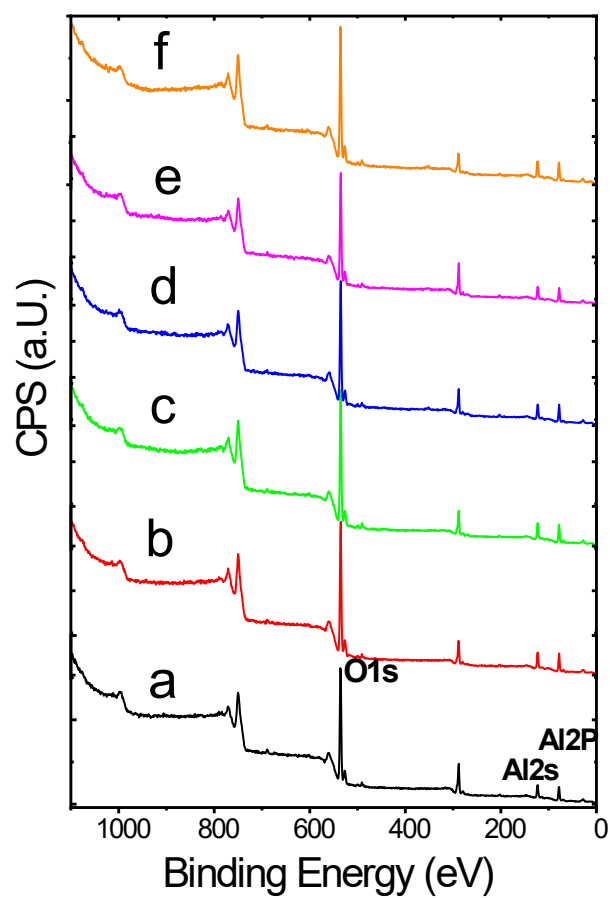

**Figure S4.** XPS survey spectra of all calcined catalysts: a. PtSn-FA, b. PtSn-N<sub>2</sub>, c. PtSn-SA, d. PtSnZnCa-FA, e. PtSnZnCa-N<sub>2</sub>, f. PtSnZnCa-SA

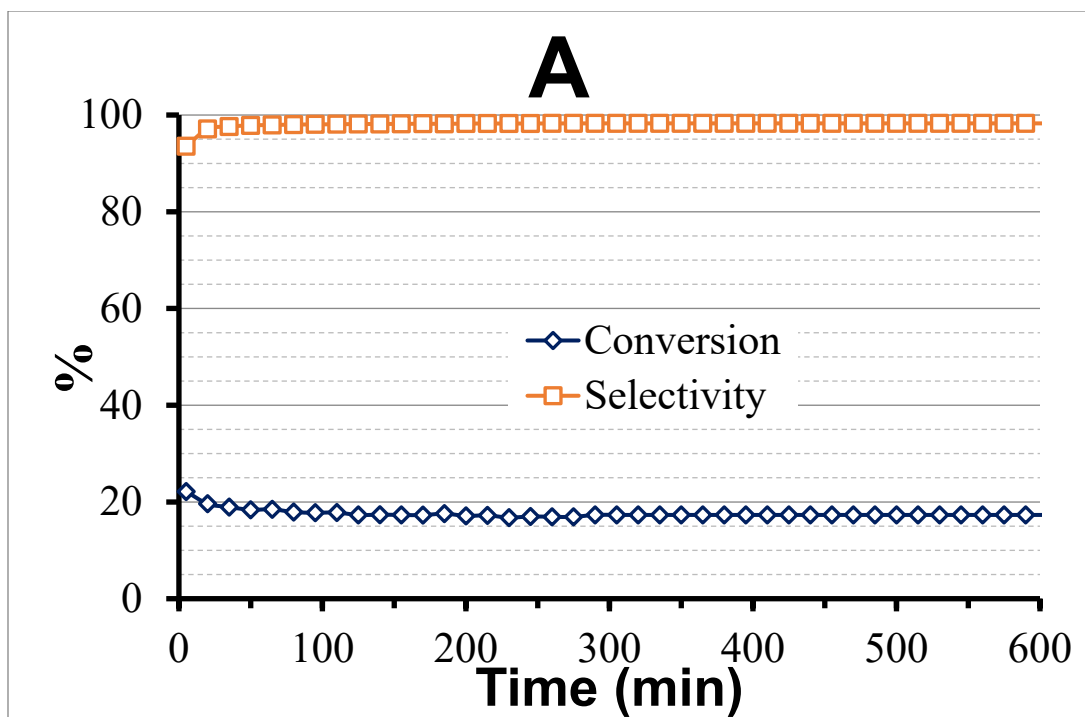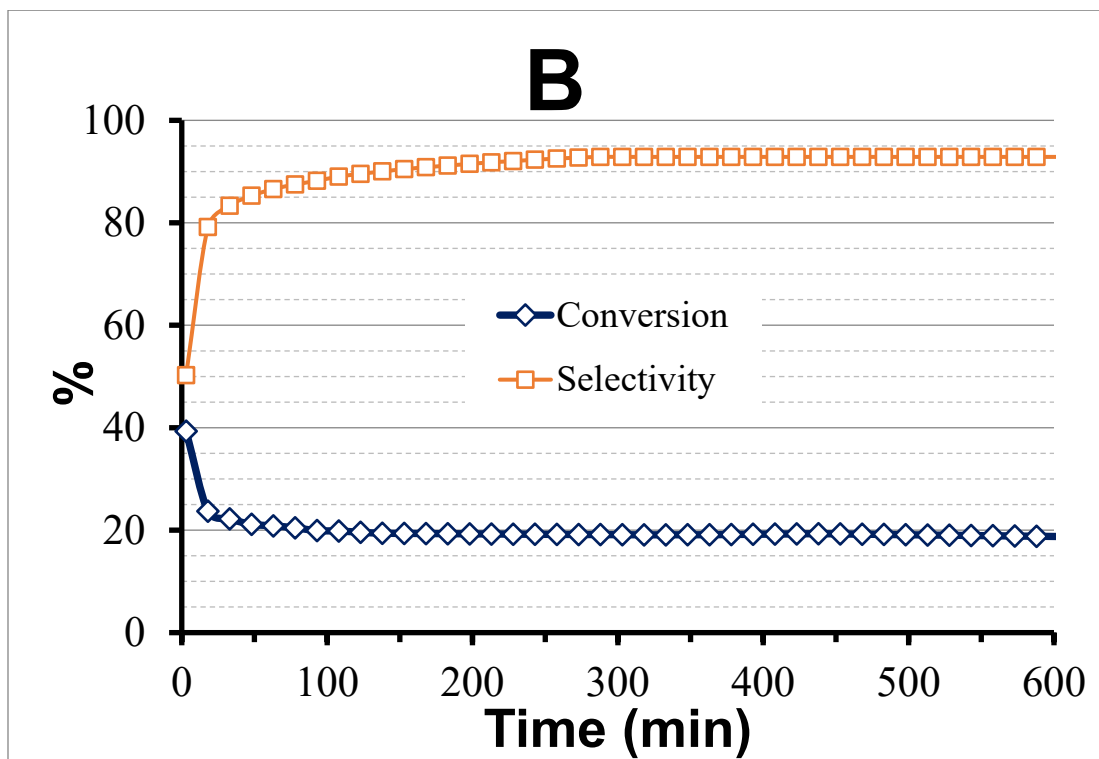

**Figure S5.** Activity results for ethane dehydrogenation at 625°C: (A) PtSnZn-SA (B)PtSnCa-SA.
